# Supplementary material for: A novel nanozyme based on selenopeptide-modified gold nanoparticles with a tunable glutathione peroxidase activity
Source: Royal Society of Chemistry journal article supplement (doi:10.1039/c9ra10262k), 2020-01-01
Supplement: c9ra10262k1.pdf [file c9ra10262k1.pdf]

# A Novel Nanozyme Based on Selenopeptide-Modified Gold Nanoparticles with a Tunable Glutathione Peroxidase Activity

Dechen Zhang,<sup>a</sup> Na Shen,<sup>a</sup> Junrong Zhang,<sup>a</sup> Jinming Zhu,<sup>b</sup> Yi Guo<sup>a</sup> and Li Xu<sup>\*a</sup>

a. Key Laboratory for Molecular Enzymology and Engineering, the Ministry of Education, National Engineering Laboratory for AIDS Vaccine, School of Life Sciences, Jilin University, Changchun 130012, P.R. China. E-mail: xuli@jlu.edu.cn

b. China-Japan Union Hospital of Jilin University, Changchun 130033, P.R. China.

A

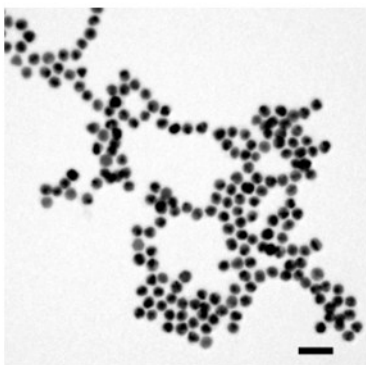

B

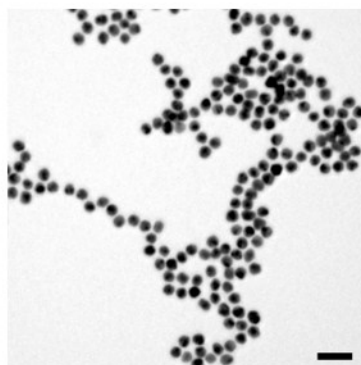

Figure S1 TEM images of nanozyme MPC 1 (A) and MPC 2 (B). Scale bar is 50 nm.
